# Supplementary material
Source: HighWire-hosted journal article supplement (https://bmjopen.bmj.com/content/11/9/e049938)
Supplement: inline-supplementary-material-1 [file inline-supplementary-material-1.pdf]

### Supplementary File

Note that for all questions the current analysis is dichotomised into strongly disagree/somewhat disagree as one value and Neutral/Somewhat agree/Strongly agree as the other.

**Sensitivity analysis A:** Questions regarding seriousness, persistence and fear of movement dichotomised into Strongly disagree/Somewhat disagree/neutral compared with Somewhat agree/Strongly agree. Comprehension remains unchanged.

**Table 1: Association between the self-reported understanding of the 14 terms overall and perceived seriousness, pain persistence and fear of movement, Spearman's rho correlation\***

|                  | Understanding | Seriousness | Pain persistence | Fear of movement |
|------------------|---------------|-------------|------------------|------------------|
| Understanding    | 1             |             |                  |                  |
| Seriousness      | 0.29          | 1           |                  |                  |
| Persistence      | 0.21          | 0.72        | 1                |                  |
| Fear of movement | 0.19          | 0.53        | 0.6              | 1                |

\*All *p* values <0.001.

Values between 0.10 and 0.29 represent a weak association, 0.30-0.49 moderate and 0.5 and above a strong association.

Table 2: Association between self-reported understanding of the 14 terms, perceived seriousness, pain persistence and fear of movement and demographic details, history of back pain and back beliefs

|                               | Understanding                                    | Seriousness                   | Pain persistence               | Fear of movement               |
|-------------------------------|--------------------------------------------------|-------------------------------|--------------------------------|--------------------------------|
|                               | Regression coefficient (95% Confidence Interval) |                               |                                |                                |
| Education (REF - High school) |                                                  |                               |                                |                                |
| Trade/Diploma                 | 0.36 (-0.01, 0.73)                               | 0.19 (-0.17, 0.56)            | -0.07 (-0.42, 0.29)            | -0.12 (-0.49, 0.24)            |
| Bachelor                      | <b>0.40 (0.07, 0.72)*</b>                        | 0.02 (-0.28, 0.32)            | 0.04 (-0.26, 0.34)             | -0.09 (-0.39, 0.22)            |
| Postgraduate qualifications   | <b>0.66 (0.23, 1.08)**</b>                       | -0.07 (-0.46, 0.33)           | -0.15 (-0.53, 0.23)            | 0.03 (-0.37, 0.43)             |
| LBP History (REF = Never)     |                                                  |                               |                                |                                |
| Previous LBP                  | 0.27 (-0.21, 0.75)                               | 0.12 (-0.28, 0.52)            | 0.15 (-0.23, 0.53)             | -0.06 (-0.46, 0.36)            |
| Current LBP                   | <b>0.50 (0.02, 0.97)*</b>                        | 0.06 (-0.34, 0.47)            | 0.14 (-0.25, 0.52)             | <b>-0.60 (-1.00, -0.19)**</b>  |
| BBQ score                     | <b>0.02 (0.0003, 0.04)*</b>                      | <b>-0.02 (-0.04, -0.005)*</b> | <b>-0.05 (-0.07, -0.03)***</b> | <b>-0.07 (-0.09, -0.05)***</b> |
| Age, years                    | 0.002 (-0.007, 0.01)                             | 0.002 (-0.01, 0.01)           | 0.003 (-0.004, 0.011)          | <b>-0.01 (-0.02, -0.01)**</b>  |
| Gender (REF = Female)         |                                                  |                               |                                |                                |
| Male                          | 0.07 (-0.20, 0.33)                               | <b>-0.39 (-0.64, -0.14)**</b> | <b>-0.32 (-0.57, -0.08)*</b>   | -0.24 (-0.49, 0.01)            |

**Note:** Bold indicates statistically significant, \* p < 0.05, \*\*p < 0.01, \*\*\*p < 0.001. Results rounded to two decimal points or first meaningful decimal point.  
REF = Reference category, LBP = Low Back Pain, BBQ = Back Beliefs Questionnaire

Continuous variables (BBQ score and age): For understanding, a positive regression coefficient indicates greater self-reported understanding is associated with better back beliefs (higher BBQ score) and increased age. For seriousness, pain persistence and fear of movement, a positive regression coefficient indicates greater worry/concern is associated with poorer back beliefs (lower BBQ score) and increased age.

Categorical variables: For understanding, a positive regression coefficient indicates increased self-reported understanding compared with the reference category. For seriousness, pain persistence and fear of movement, a positive regression coefficient indicates greater worry/concern compared with the reference variable.

**Sensitivity analysis B:** Neutral answers removed. Dichotomy is strongly disagree/somewhat disagree vs somewhat agree/strongly agree.

**Table 3: Association between the self-reported understanding of the 14 terms overall and perceived seriousness, pain persistence and fear of movement, Spearman's rho correlation\***

|                  | Understanding | Seriousness | Pain persistence | Fear of movement |
|------------------|---------------|-------------|------------------|------------------|
| Understanding    | 1             |             |                  |                  |
| Seriousness      | 0.60          | 1           |                  |                  |
| Persistence      | 0.45          | 0.72        | 1                |                  |
| Fear of movement | 0.37          | 0.53        | 0.6              | 1                |

\*All *p* values <0.001.

Values between 0.10 and 0.29 represent a weak association, 0.30-0.49 moderate and 0.5 and above a strong association.

**Table 4: Association between self-reported understanding of the 14 terms, perceived seriousness, pain persistence and fear of movement and demographic details, history of back pain and back beliefs**

|                               | Understanding                                    | Seriousness                   | Pain persistence               | Fear of movement               |
|-------------------------------|--------------------------------------------------|-------------------------------|--------------------------------|--------------------------------|
|                               | Regression coefficient (95% Confidence Interval) |                               |                                |                                |
| Education (REF - High school) |                                                  |                               |                                |                                |
| Trade/Diploma                 | 0.27 (-0.11, 0.65)                               | 0.005 (-0.59, 0.60)           | -0.42 (-0.97, 0.13)            | -0.39 (-0.88, 0.09)            |
| Bachelor                      | 0.32 (-0.01, 0.66)                               | - 0.16 (-0.63, 0.31)          | -0.19 (-0.63, 0.26)            | <b>-0.45 (-0.87, -0.04)*</b>   |
| Postgraduate qualifications   | <b>0.55 (0.12, 0.98)*</b>                        | 0.43 (-1.03, 0.17)            | <b>-0.77 (-1.32, -0.23)**</b>  | <b>-0.65 (-1.15, -0.14)*</b>   |
| LBP History (REF = Never)     |                                                  |                               |                                |                                |
| Previous LBP                  | 0.18 (-0.30, 0.66)                               | 0.21 (-0.41, 0.83)            | -0.01 (-0.58, 0.56)            | -0.19 (-0.71, 0.33)            |
| Current LBP                   | <b>0.55 (0.07, 1.02)*</b>                        | -0.01 (-0.63, 0.61)           | -0.18 (-0.76, 0.40)            | <b>-0.61 (-1.14, -0.08)*</b>   |
| BBQ score                     | <b>0.03 (0.01, 0.05)*</b>                        | <b>-0.04 (-0.07, -0.01)**</b> | <b>-0.08 (-0.11, -0.05)***</b> | <b>-0.08 (-0.11, -0.05)***</b> |
| Age, years                    | -0.003 (-0.01, 0.01)                             | <b>0.02 (0.01, 0.04)***</b>   | <b>0.03 (0.02, 0.04)***</b>    | -0.01 (-0.02, 0.001)           |
| Gender (REF = Female)         |                                                  |                               |                                |                                |
| Male                          | 0.17 (-0.10, 0.44)                               | <b>-0.49 (-0.90, -0.08)*</b>  | -0.27 (-0.64, 0.11)            | -0.30 (-0.64, 0.04)            |

**Note:** Bold indicates statistically significant, \* p < 0.05, \*\*p < 0.01, \*\*\*p < 0.001. Results rounded to two decimal points or first meaningful decimal point.

REF = Reference category, LBP = Low Back Pain, BBQ = Back Beliefs Questionnaire

Continuous variables (BBQ score and age): For understanding, a positive regression coefficient indicates greater self-reported understanding is associated with better back beliefs (higher BBQ score) and increased age. For seriousness, pain persistence and fear of movement, a positive regression coefficient indicates greater worry/concern is associated with poorer back beliefs (lower BBQ score) and increased age.

Categorical variables: For understanding, a positive regression coefficient indicates increased self-reported understanding compared with the reference category. For seriousness, pain persistence and fear of movement, a positive regression coefficient indicates greater worry/concern compared with the reference variable.
